# Supplementary material
Source: PubMed Central journal article supplement (PMC4187760)
Supplement: JCM.01028-14_zjm999093744so1.pdf [file JCM.01028-14_zjm999093744so1.pdf]

## Supplemental Figure S1

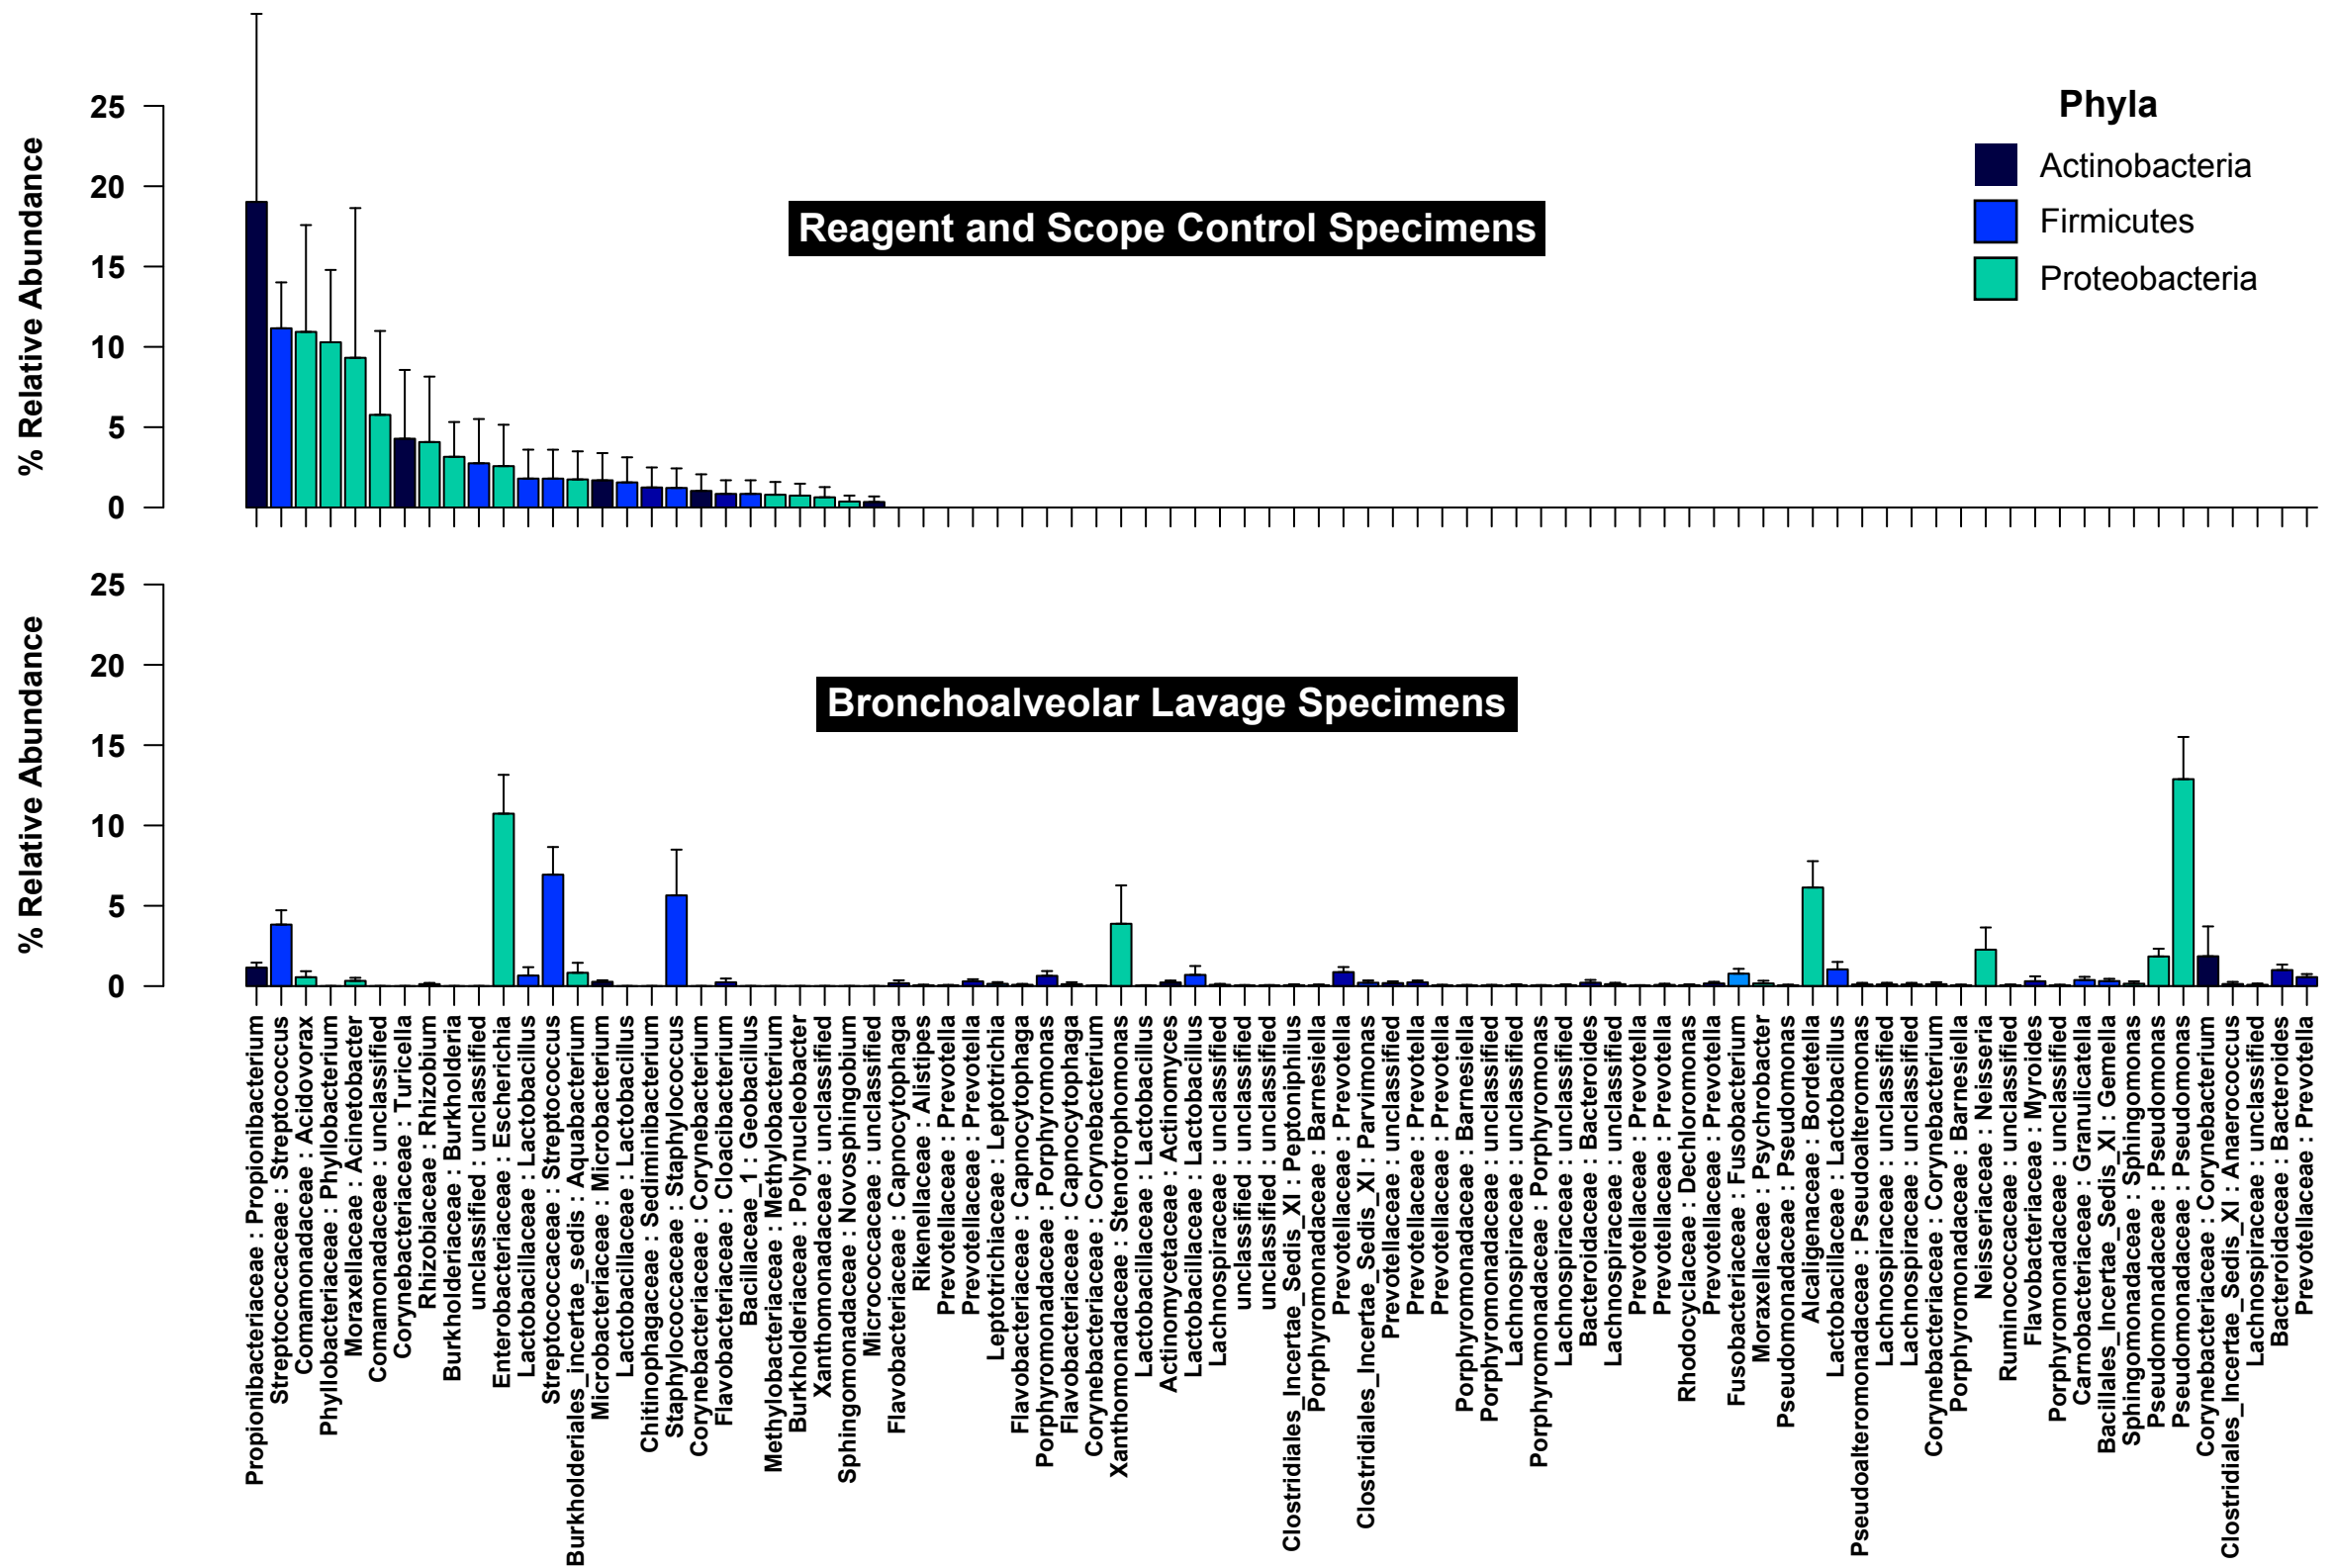

**Supplemental Figure 1: Relative abundance of OTUs detected in scope and reagent control specimens and BAL specimens.** On average, BAL specimens contained 921-fold greater 16S DNA than control specimens as measured by qPCR. Bacterial communities detected in negative control specimens were significantly distinct from those detected in BAL specimens ( $P \leq 0.001$ , PERMANOVA [adonis]).
